## Editorial

It is with great pleasure that we convey our greetings and best wishes to all the readers of *Urologia Internationalis*, an established journal of urology in Europe and indeed, worldwide, as well as to the readers of *Acta Urologica Italica* which, for many years, has been the official journal of the Italian Society of Urology (SIU).

From this first issue of the year 2000 onwards, the two journals will be amalgamated thanks to an agreement between Karger Publishers and the Italian Society of Urology, which was accepted enthusiastically by the Editors of both journals.

The new journal *Urologia Internationalis*, in association with *Acta Urologica Italica*, will be sent to all members of the Italian Society of Urology, at present over 1,800, who now join the subscribers of *Urologia Internationalis*.

We believe the merger to be advantageous for the journal as it will have more readers and a wider distribution. Italian urologists will thus have a prestigious journal as their official periodical, one which is renowned internationally in the field, and, thanks to the editors for Italy, the Italian Society of Urology's services and links guaranteed in *Acta Urologica Italica* will be maintained.

We would like to express our gratitude and appreciation to Karger Publishers and to the editors Prof. Hauri and Prof. Wirth who enlarged the Editorial Committee and Board. They modified and renewed their organizational and work processes in order to welcome and insert the contribution of the work and experience of many Italian urologists nominated by the Editors-in-Chief under the suggestion of the Italian Society of Urology.

We are convinced that this new journal, based on consolidated experience to which it remains committed, will extend its distribution and become more popular with readers in the field of urology all over the world.

On behalf of all Italian urologists we take this opportunity to express our commitment to the success of *Urologia Internationalis* in association with *Acta Urologica Italica*.

*Prof. Enrico Pisani*  
President  
Italian Society of Urology

*Prof. Massimo Porena*  
Editor  
*Urologia Internationalis*  
*Acta Urologica Italica*
